# Supplementary material for: Locus coeruleus noradrenergic neurons phase-lock to prefrontal and hippocampal infra-slow rhythms that synchronize to behavioral events
Source: PubMed Central journal article supplement (PMC10070758; doi:10.3389/fncel.2023.1131151), 2023-03-21
Supplement: Image_2.pdf [file Image_2.pdf]

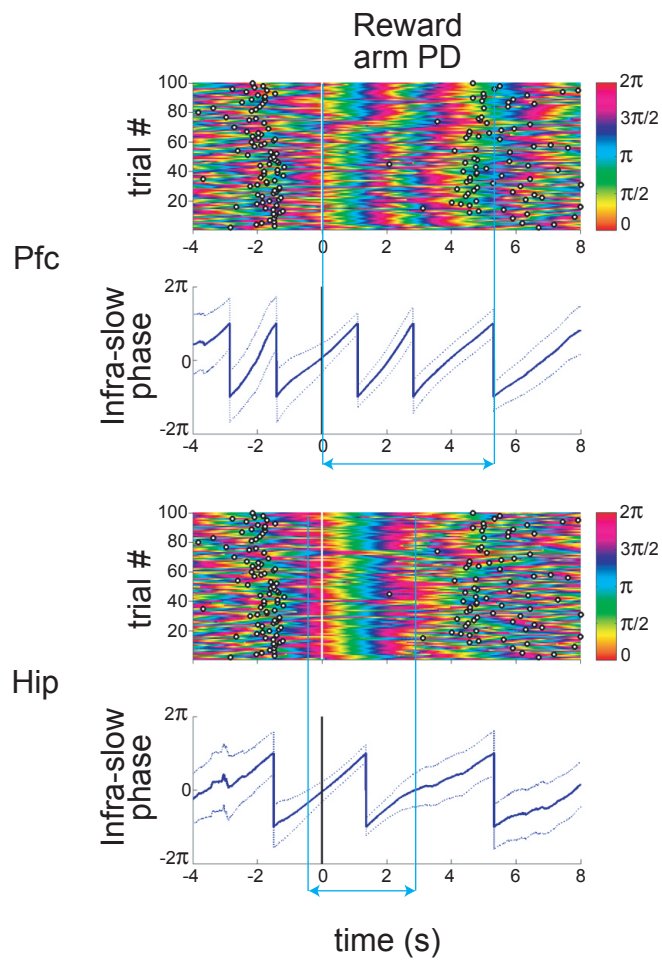

Supplementary Figure 2. Infra-slow rhythms recorded simultaneously in Hip and Pfc can have different cycle lengths. Note that regular phase-locking to Rwd extends for about 2.5 infra-slow cycles in Pfc, but only about 1 cycle for Hip. The durations of the cycles are about 2.1 s (corresponding to 0.48 Hz) for the first Pfc Rwd cycle, 1.9 s for the second (0.53 Hz), and 3.1 s for Hip Rwd (0.32 Hz). (Same format as Figure 4.)
