# Supplementary material for: Locus coeruleus noradrenergic neurons phase-lock to prefrontal and hippocampal infra-slow rhythms that synchronize to behavioral events
Source: PubMed Central journal article supplement (PMC10070758; doi:10.3389/fncel.2023.1131151), 2023-03-21
Supplement: Image_3.pdf [file Image_3.pdf]

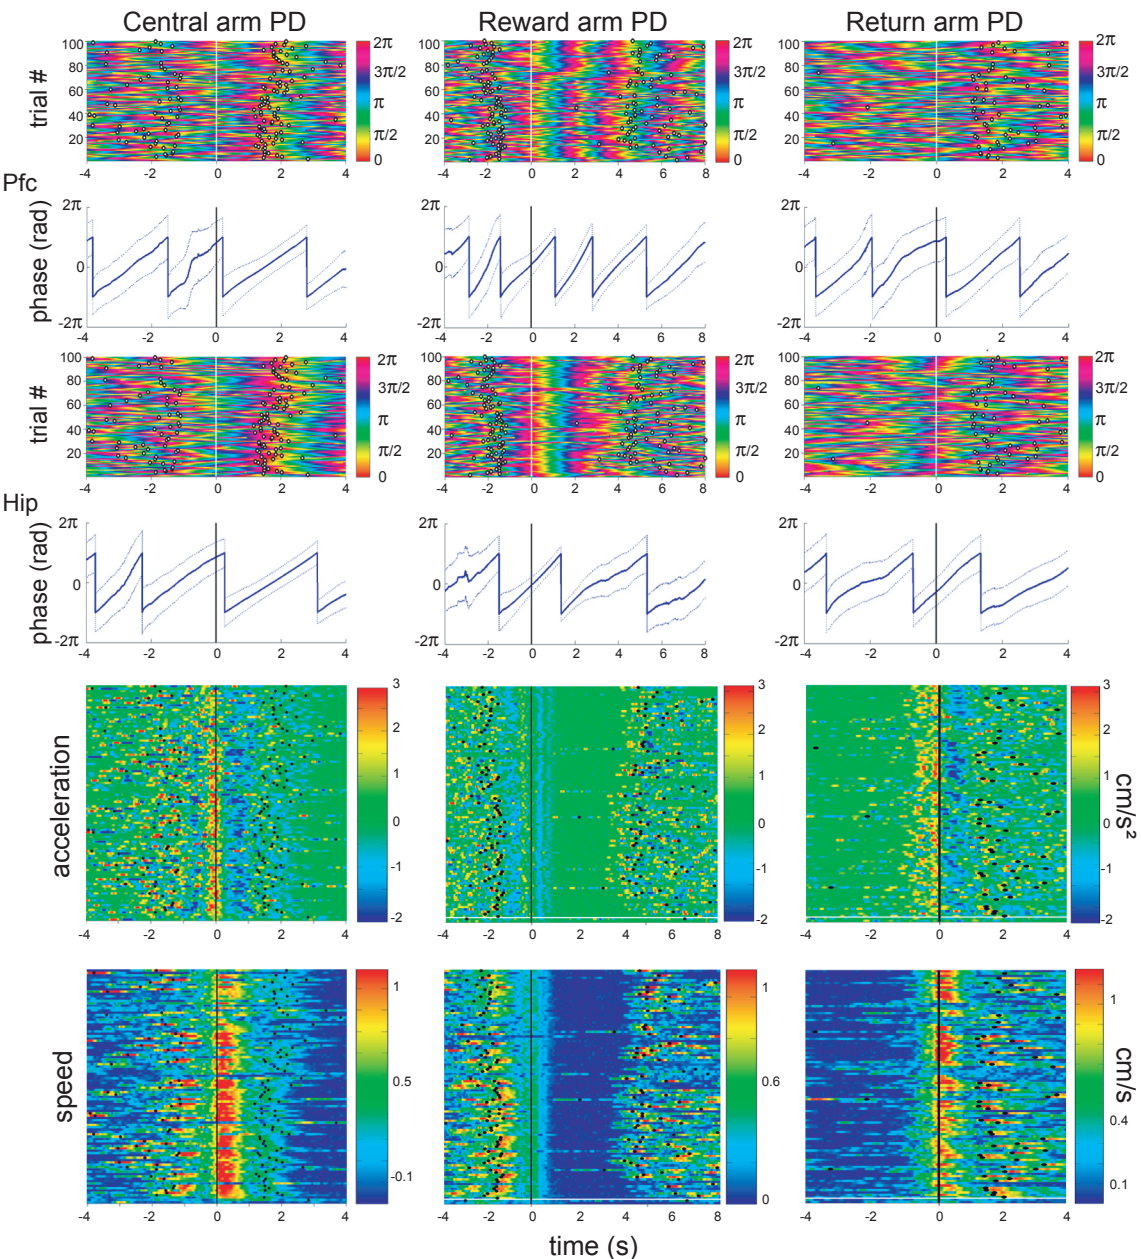

Supplementary Figure 3. Example of lack of a clear relation between speed, acceleration and infra-slow phase. Acceleration increases before central and return arm PD crossings, with speed increasing afterwards. But, the phase is  $\pi$  radians for the former and  $-0.2 \cdot \pi$  radians for the latter.
