# Supplementary material for: Locus coeruleus noradrenergic neurons phase-lock to prefrontal and hippocampal infra-slow rhythms that synchronize to behavioral events
Source: PubMed Central journal article supplement (PMC10070758; doi:10.3389/fncel.2023.1131151), 2023-03-21
Supplement: Image_5.pdf [file Image_5.pdf]

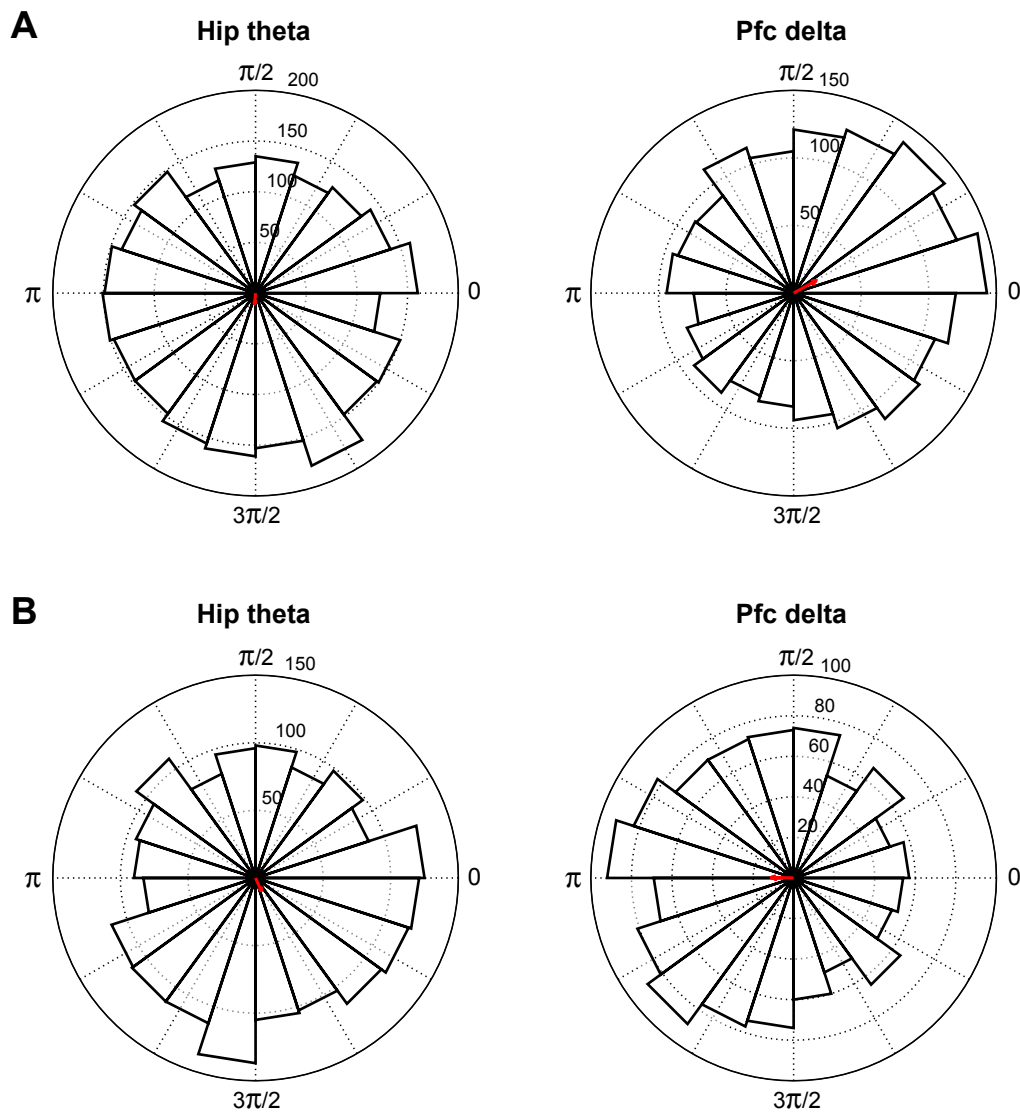

Supplementary Figure 5. Examples of phase-locking of LC neurons to hippocampal theta (filtered 5-10 Hz) and prefrontal delta (filtered 1-4 Hz) rhythms. A and B are two different neurons from two different rats. Same format as Figure 2. A) Hip theta:  $p=2.6E-4$  (Rayleigh test), resultant vector  $\phi=4.6$  radians; Pfc delta:  $p=4.2E-15$  (Rayleigh test),  $\phi=0.5$  radians, B) Hip theta:  $p=6.2E-5$  (Rayleigh test),  $\phi=5.1$  radians; Pfc delta:  $p=7.4E-8$ ;  $\phi=3.1$  radians.
